# Supplementary material for: microRNA-9 Suppresses the Proliferation, Invasion and Metastasis of Gastric Cancer Cells through Targeting Cyclin D1 and Ets1
Source: PubMed Central journal article supplement (PMC3561302; doi:10.1371/journal.pone.0055719), 2013-01-31
Supplement: pone.0055719.s001.pdf [file pone.0055719.s001.pdf]

# Supplementary Figure S1

Adjacent non-neoplastic

Intestine-type

Diffuse-type

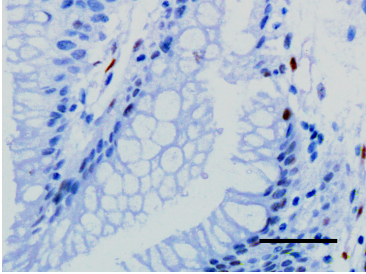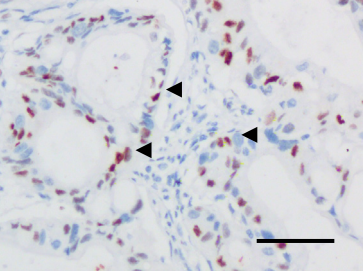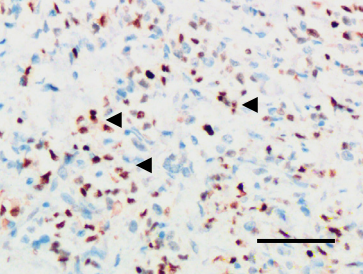

cyclin D1

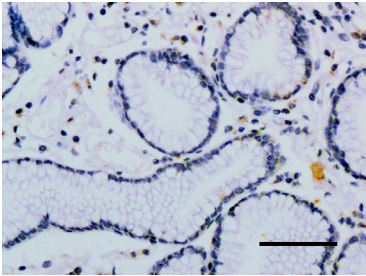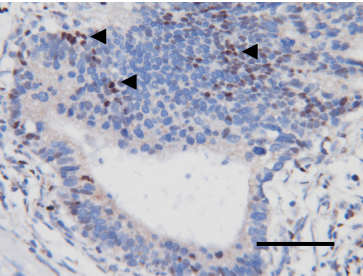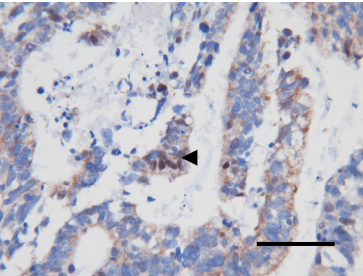

Ets1
