# Supplementary material for: microRNA-9 Suppresses the Proliferation, Invasion and Metastasis of Gastric Cancer Cells through Targeting Cyclin D1 and Ets1
Source: PubMed Central journal article supplement (PMC3561302; doi:10.1371/journal.pone.0055719), 2013-01-31
Supplement: pone.0055719.s006.pdf [file pone.0055719.s006.pdf]

Supplementary Table S1 Cyclin D1, Ets1 and miR-9 expression in human gastric cancer tissues

| Clinicopathologic factor     | Total     | cyclin D1 expression |                 | Ets1 expression |                 | miR-9 expression |                 |
|------------------------------|-----------|----------------------|-----------------|-----------------|-----------------|------------------|-----------------|
|                              | n (%)     | n (%)                | <i>P</i> -value | n (%)           | <i>P</i> -value | mean (SEM)       | <i>P</i> -value |
| <b>Age (years)</b>           |           |                      |                 |                 |                 |                  |                 |
| ≤60                          | 44 (51.2) | 12 (27.3)            | 0.640           | 28 (63.6)       | 0.495           | 1.3541 (0.1583)  | 0.830           |
| >60                          | 42 (48.8) | 14 (33.3)            |                 | 30 (71.4)       |                 | 1.3055 (0.1601)  |                 |
| <b>Sex</b>                   |           |                      |                 |                 |                 |                  |                 |
| Male                         | 60 (69.8) | 16 (26.7)            | 0.312           | 38 (63.3)       | 0.317           | 1.3387 (0.1239)  | 0.911           |
| Female                       | 26 (30.2) | 10 (38.5)            |                 | 20 (76.9)       |                 | 1.3112 (0.2394)  |                 |
| <b>Size (diameter)</b>       |           |                      |                 |                 |                 |                  |                 |
| ≤6 cm                        | 56 (65.1) | 16 (28.6)            | 0.806           | 36 (64.3)       | 0.473           | 1.3261 (0.1289)  | 0.959           |
| >6 cm                        | 30 (34.9) | 10 (33.3)            |                 | 22 (73.3)       |                 | 1.3383 (0.2154)  |                 |
| <b>Laurén classification</b> |           |                      |                 |                 |                 |                  |                 |
| Intestinal type              | 50 (58.1) | 14 (28.0)            | 0.639           | 34 (68.0)       | 1.000           | 1.3730 (0.1301)  | 0.656           |
| Diffuse type                 | 36 (41.9) | 12 (33.3)            |                 | 24 (66.7)       |                 | 1.2711 (0.1991)  |                 |
| <b>Gastric wall invasion</b> |           |                      |                 |                 |                 |                  |                 |
| T1/T2                        | 22 (25.6) | 0 (0.00)             | <0.001          | 8 (36.4)        | 0.001           | 2.3127 (0.2062)  | <0.001          |
| T3/T4                        | 64 (74.4) | 26 (40.6)            |                 | 50 (78.1)       |                 | 0.9927 (0.1038)  |                 |
| <b>Lymph node metastasis</b> |           |                      |                 |                 |                 |                  |                 |
| Negative                     | 22 (25.6) | 0 (0.00)             | <0.001          | 6 (27.3)        | <0.001          | 1.9809 (0.2133)  | <0.001          |
| Positive                     | 64 (74.4) | 26 (40.6)            |                 | 52 (81.3)       |                 | 1.1067 (0.1200)  |                 |
| <b>Distant metastasis</b>    |           |                      |                 |                 |                 |                  |                 |
| Negative                     | 66 (76.7) | 12 (18.2)            | <0.001          | 38 (57.6)       | <0.001          | 1.4705 (0.1201)  | 0.022           |
| Positive                     | 20 (23.3) | 14 (70.0)            |                 | 20 (100.0)      |                 | 0.8680 (0.2522)  |                 |
| <b>TNM stage</b>             |           |                      |                 |                 |                 |                  |                 |
| I/II                         | 30 (34.9) | 2 (6.7)              | <0.001          | 14 (46.7)       | 0.004           | 1.7207 (0.1544)  | 0.010           |
| III/IV                       | 56 (65.1) | 24 (42.9)            |                 | 44 (78.6)       |                 | 1.1213 (0.1439)  |                 |

Ets1, v-ets erythroblastosis virus E26 oncogene homolog 1; SEM, standard error of the mean
