# Supplementary material for: microRNA-9 Suppresses the Proliferation, Invasion and Metastasis of Gastric Cancer Cells through Targeting Cyclin D1 and Ets1
Source: PubMed Central journal article supplement (PMC3561302; doi:10.1371/journal.pone.0055719), 2013-01-31
Supplement: pone.0055719.s007.pdf [file pone.0055719.s007.pdf]

**Supplementary Table S2 Primer sets used for RT-PCR and qPCR**

| <b>Primer set</b> | <b>Primers</b> | <b>Sequence</b>            | <b>Product size (bp)</b> | <b>Application</b> |
|-------------------|----------------|----------------------------|--------------------------|--------------------|
| cyclin D1         | Forward        | 5'-TGAACTACCTGGACCGCT-3'   | 268                      | RT-PCR, qPCR       |
|                   | Reverse        | 5'-GCCTCTGGCATTTTGGAG-3'   |                          |                    |
| Ets1              | Forward        | 5'-TTCACTAAAGAACAGCAAC-3'  | 205                      | RT-PCR, qPCR       |
|                   | Reverse        | 5'-TGTCCTCCCAACAAAGTCTG-3' |                          |                    |
| MMP-9             | Forward        | 5'-CAGAGATGCGTGGAGAGT-3'   | 220                      | RT-PCR, qPCR       |
|                   | Reverse        | 5'-TCTTCCGAGTAGTTTTGG-3'   |                          |                    |
| $\beta$ -actin    | Forward        | 5'-ATCTACGAGGGGTATGCC-3'   | 227                      | RT-PCR, qPCR       |
|                   | Reverse        | 5'-TAGCTCTTCTCCAGGGAG-3'   |                          |                    |
| miR-9             | Forward        | RiboBio                    |                          | qPCR               |
|                   | Reverse        | RiboBio                    |                          |                    |
| U6                | Forward        | RiboBio                    |                          | qPCR               |
|                   | Reverse        | RiboBio                    |                          |                    |

Ets1, v-ets erythroblastosis virus E26 oncogene homolog 1; MMP-9, matrix metalloproteinase 9
