# Supplementary material for: microRNA-9 Suppresses the Proliferation, Invasion and Metastasis of Gastric Cancer Cells through Targeting Cyclin D1 and Ets1
Source: PubMed Central journal article supplement (PMC3561302; doi:10.1371/journal.pone.0055719), 2013-01-31
Supplement: pone.0055719.s008.pdf [file pone.0055719.s008.pdf]

**Supplementary Table S3 Oligonucleotide sets used for constructs, miRNA inhibitor and small interfering RNAs**

| <b>Oligo Set</b>                 | <b>Sequences</b>                                                                                                                                                                       |
|----------------------------------|----------------------------------------------------------------------------------------------------------------------------------------------------------------------------------------|
| Pre-miR-9                        | 5'-TGCTGTCTTTGGTTATCTAGCTGTATGAGTTTTGGCCACT<br>GACTGACTCATACAGAGATAACCAAAGA-3' (sense);<br>5'-CCTGTCTTTGGTTATCTCTGTATGAGTCAGTCAGTGGCCA<br>AAACTCATAC AGCTAGATAACCAAAGAC-3' (antisense) |
| Negative control                 | 5'-TGCTGAAATGTACTGCGCGTGGAGACGTTTTGGCCACTG<br>ACTGACGTCTCCACGCAGTACATTT-3' (sense)<br>5'-CCTGAAATGTACTGCGTGGAGACGTCAGTCAGTGGCCAA<br>AACGTCTCCACGCAGTACATTTTC-3' (antisense)            |
| pmiR-RB-cyclin D1<br>(wide type) | 5'-CCGCTCGAGCCCCTGACAGTCCCTCCT-3' (sense);<br>5'-GAATGCGGCCGCTGGGGTTTTACCAGTTTTAT- 3' (antisense)                                                                                      |
| pmiR-RB-cyclin D1<br>(mutant)    | 5'-GTTGTGTGTATCGAGAGGCCTTAGGCTGGTGG -3' (sense);<br>5'-GGCCTCTCGATACACACAACATCCAGGACT- 3' (antisense)                                                                                  |
| pmiR-RB-Ets1<br>(wide type)      | 5'-CCGCTCGAGTGGCACTGAAGGGGCTGGGGAAA-3' (sense);<br>5'-GAATGCGGCCGCTCTCCAGCAAATGATG- 3' (antisense)                                                                                     |
| pmiR-RB-Ets1<br>(mutant)         | 5'-GTTTTTTCTCCTTTGTCCTTAGGCCAGAGAC-3' (sense)<br>5'-GGACAAAGGAGAAAAAACATCTGGCCAG-3' (antisense)                                                                                        |
| pcDNA3.1-cyclin D1               | 5'-CGCCCAAGCTTATGGAACACCAGCTCCTG-3' (sense)<br>5'-CTAGTCTAGATCAGATGTCCACGTCCCG-3' (antisense)                                                                                          |
| pcDNA3.1-Ets1                    | 5'-CGCCCAAGCTTATGAGCTACTTTGTGGATTC-3' (sense)<br>5'-CTAGTCTAGATCACTCGTCGGCATCTGGCT-3' (antisense)                                                                                      |
| Anti-NC                          | RiboBio                                                                                                                                                                                |
| Anti-miR-9                       | RiboBio                                                                                                                                                                                |
| si-Scb                           | 5'-GGAUUGGAAACGCAUUAUUt-3' (sense);<br>5'-AUAUAUGCGUUUCCAAUCct-3' (antisense)                                                                                                          |
| si-CCND1                         | 5'-GUUCAUUUCCAAUCCGCCct-3' (sense);<br>5'-GGGCGGAUUGGAAAUGAACct-3' (antisense)                                                                                                         |
| si-Ets1                          | 5'-AUAGAGAGCUACGAUAGUUt-3' (sense);<br>5'-AACUAUCGUAGCUCUCUAUt-3' (antisense)                                                                                                          |

Ets1, v-ets erythroblastosis virus E26 oncogene homolog 1; CCND1, cyclin D1; Anti-NC, negative control inhibitor; si-Scb, scramble siRNA
